# Supplementary material
Source: PubMed Central journal article supplement (PMC4587899)

## 1 **Supplemental Methods**

2

### 3 **Intracellular staining of Th2 cytokines in lung cells**

4 To identify the cellular sources of Th2 cytokines in the airways, lung cells were isolated  
5 as previously described, by collagenase digestion (64). Lung leukocytes were purified by 35%  
6 Percoll gradient centrifugation and counted. After 6 hours of stimulation with  
7 PMA/ionomycin/brefeldin A, cells were examined for intracellular cytokine staining after cell-  
8 surface staining with allophycocyanin-conjugated anti-CD4 mAb (eBioscience), followed by  
9 fixation with 4% paraformaldehyde and permeabilization with 0.1% saponin buffer.

10 Phycoerythrin-conjugated anti-IL-4, anti-IL-5 or anti-IL-13 mAbs (eBioscience) were  
11 used for intracellular cytokine staining and flow cytometry data using a FACSCalibur were  
12 analyzed with FlowJo software (TreeStar, Ashland, OR).

13

### 14 **Eosinophils numbers and peroxidase content in peripheral blood from WT and IL-10<sup>-/-</sup>** 15 **mice**

16 To determine whether numbers of eosinophils in blood of IL-10<sup>-/-</sup> mice differed from  
17 those of WT mice, peripheral blood was collected with some modification of methods described  
18 previously (65). Briefly, 100 µl of peripheral blood was collected into 1 mL of ice-cold 1X-PBS  
19 containing 2% FCS and 20 U/mL of heparin. The tubes were centrifuged and cell pellets were  
20 collected. Pellets were suspended in 1 mL of ice-cold distilled water for 1 minute to lyse red  
21 blood cells (RBC). After addition of 10X PBS to stop RBC lysis, tubes were centrifuged to  
22 collect white blood cells. Cytospin slides were made and stained with Wright-Giemsa to

23 differentiate cell composition. The levels of eosinophil peroxidase (EPO) in the cell pellets were  
24 measured by ELISA as previously described (66).

25

26

27

### 28 **Lung tissue distribution of eosinophils following bone marrow reconstitution**

29 To identify eosinophils in the lung tissue of PHIL mice following bone marrow cell  
30 transfer, immunohistochemistry with anti-mouse major basic protein (MBP) monoclonal  
31 antibody was performed. Lung tissue sections from mice sensitized and challenged to OVA 7  
32 times. Compared were WT or PHIL mice following no treatment or PHIL recipients of bone  
33 marrow cells from WT or IL-10<sup>-/-</sup> mice. Sections were analyzed as described previously (67).  
34 Images of stained lung tissue sections were captured by digital camera and the numbers of MBP-  
35 positive cells around airways were quantified with NIH Image J software.

36

### 37 **Generation of bone marrow-derived eosinophils and determination of IL-10 production**

38 To determine the capability of IL-10 production by eosinophils under different  
39 conditions, eosinophils were generated from bone marrow cells and examined *in vitro*. Bone  
40 marrow cells were isolated from femurs and tibias of WT and IL-10<sup>-/-</sup> mice, and cultured with  
41 recombinant mouse stem cell factor and Flt3-ligand (both from PeproTech, Rocky Hill, NJ)  
42 followed by culture with recombinant mouse IL-5 (PeproTech) according to the methods  
43 described by Dyer KD et al. (68). At the end of the culture period, cells were differentiated by  
44 Wright-Giemsa staining on cytopsin slides; eosinophils comprised more than 90% of the cells.  
45 The cells were then cultured in complete RPMI 1640 medium (4x10<sup>6</sup> cells/ml) and stimulated

46 with PMA/ionomycin/brefeldin A for 24 hrs. Supernatants were collected and levels of IL-10  
47 determined by ELISA (eBioscience). EPO levels in bone marrow-derived eosinophils were  
48 measured by ELISA as described above.

49

50

51

52 **Supplemental Figure Legends**

53

54 **Figure E1.** Numbers of IL-4-, IL-5-, or IL-13-positive CD4<sup>+</sup> T cells in lungs. To identify the  
55 source of Th2 cytokines in sensitized and 7 times OVA challenged WT or PHIL mice,  
56 intracellular cytokine staining was carried out. WT mice which received sham sensitization  
57 followed by 7 times OVA challenge served as controls. Isolated lung leukocytes were activated  
58 with PMA/ionomycin and then stained with anti-CD4 followed by intracellular cytokine staining.  
59 Numbers of IL-4-, IL-5-, or IL-13-positive CD4<sup>+</sup> T cells in lungs were calculated and  
60 expressed as histograms. n=5. \*p<0.05 vs. WT PBS/OVA-7 group.

61

62 **Figure E2.** Circulating eosinophil numbers in WT and IL-10<sup>-/-</sup> mice were shown to be similar by  
63 either (A) cell differential assessment of white blood cells following Wright's-Giemsa staining or  
64 by (B) ELISA assessments of eosinophil peroxidase levels (arbitrary EPX units/1x10<sup>6</sup> of  
65 eosinophils) in unfractionated white blood cell pellets (n=5 mice/group).

66

67 **Figure E3.** Localization of eosinophils in the lung tissue following bone marrow cell transfer.  
68 Lung tissues were stained with anti-mouse major basic protein (MBP) antibody. (A)  
69 Representative photomicrographs of lung tissue from (a) vehicle-treated WT mice after  
70 sensitization and 7 OVA challenges, (b) vehicle-treated PHIL mice after sensitization and 7  
71 OVA challenges, (c) PHIL mice which received bone marrow cells from WT mice after  
72 sensitization and 7 OVA challenges, (d) PHIL mice which received bone marrow cells from IL-  
73 10<sup>-/-</sup> mice after sensitization and 7 OVA challenges, and (B) numbers of MBP-positive cells.  
74 n=6. \*p<0.05 vs. PHIL OVA/OVA-7+vehicle group.

75

76 **Figure E4.** Characterization of bone marrow-derived eosinophils.. Following stimulation with  
77 PMA/ionomycin, levels of (A) IL-10 (ng/mL), or (B) eosinophil peroxidase (arbitrary EPX  
78 units/mL) in cell culture supernatants from eosinophils derived from WT and IL-10<sup>-/-</sup> mice were  
79 measured by ELISA. (n=5 mice/group). \*p<0.05

80

Figure E1

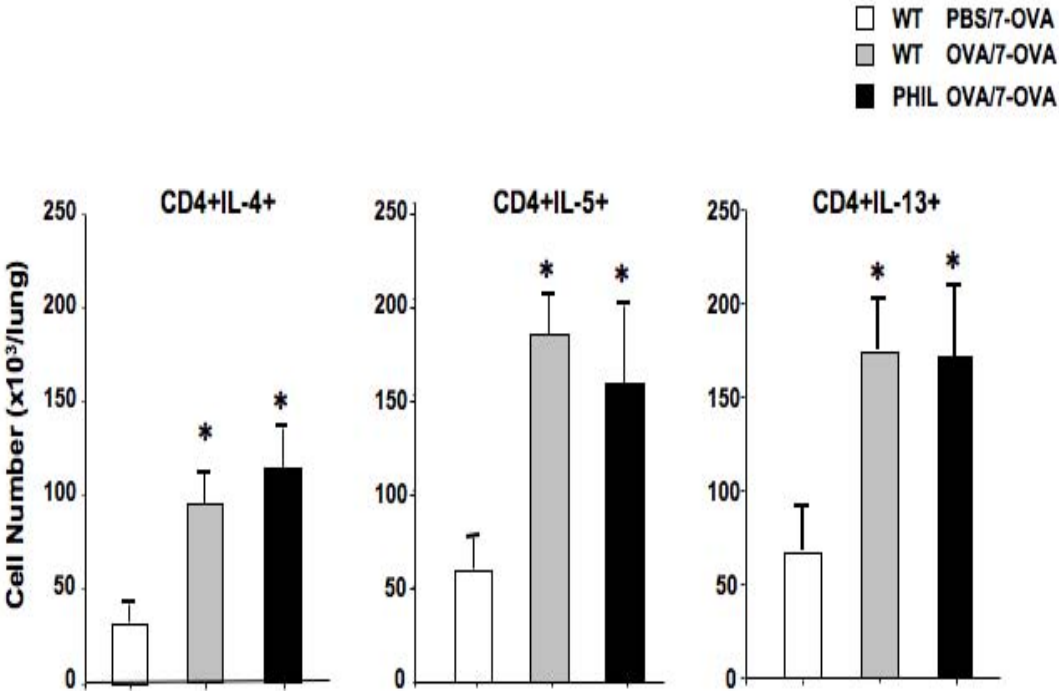

**Figure E2**

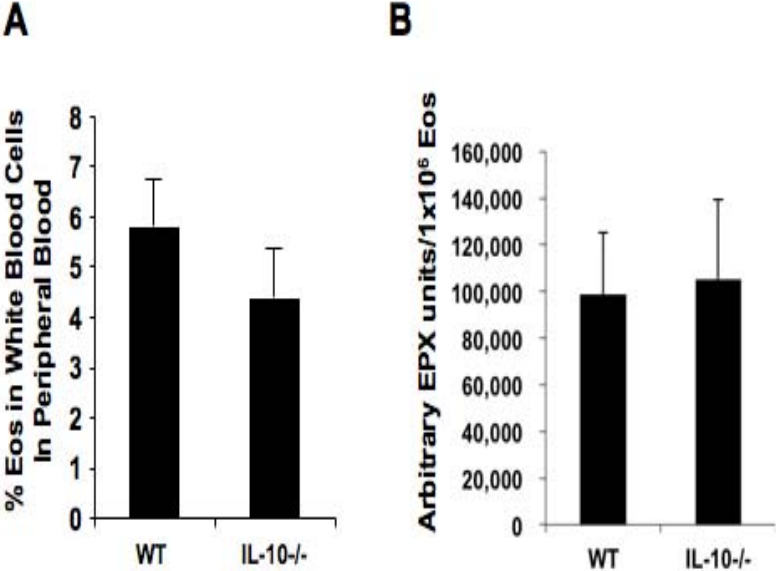

**Figure E3**

**A**

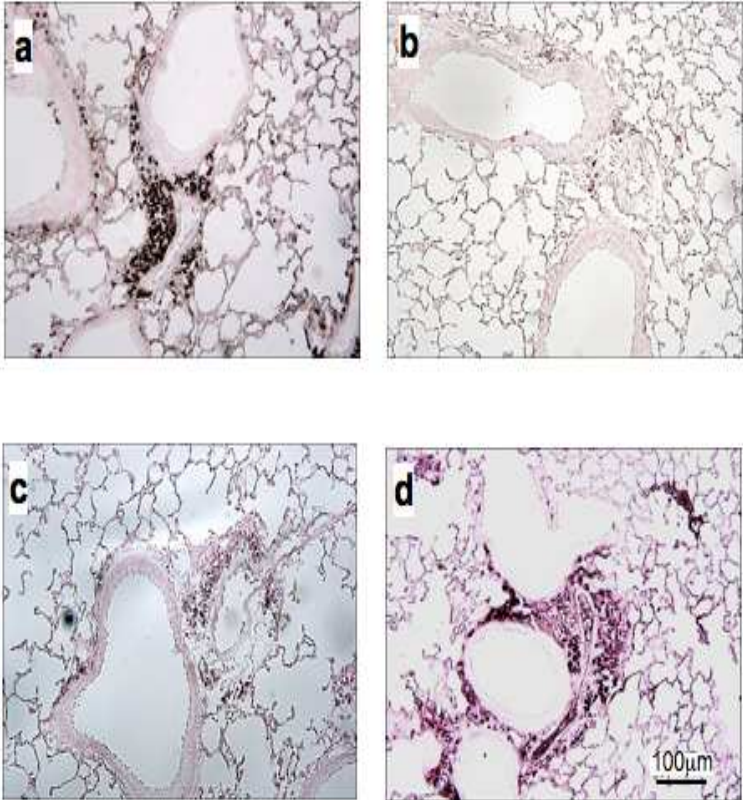

**B**

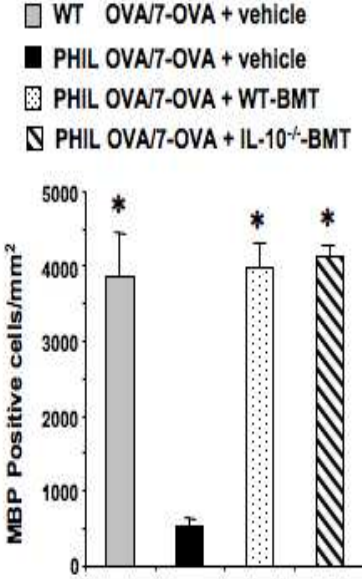



Figure E4

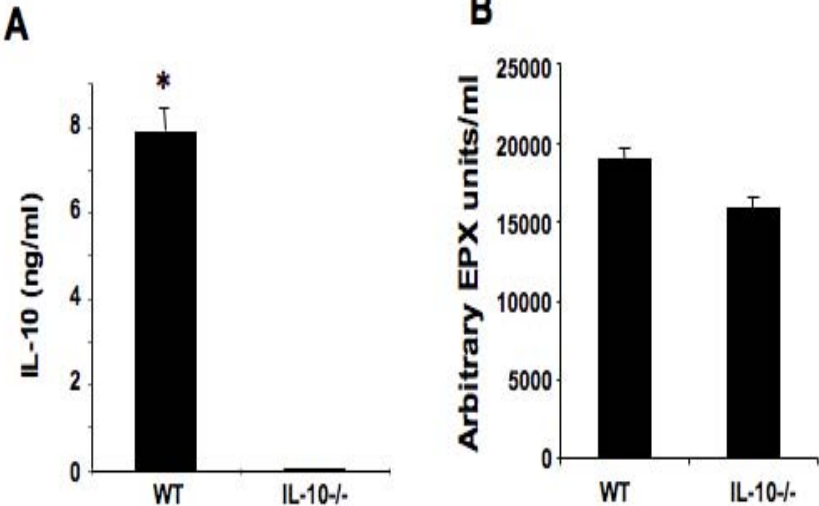

Supplement: NIHMS634985-supplement-01.pdf [file NIHMS634985-supplement-01.pdf]
